# Supplementary material
Source: PubMed Central journal article supplement (PMC7567934)
Supplement: mmc1.pdf [file mmc1.pdf]

# Assessing the Public Perception of Treated Wastewater Reuse in Canaanland, Nigeria

This questionnaire is a research tool designed to determine the perception of the Canaanland city on the subject of treated Wastewater Reuse.

\*Reclaimed or recycled water (also called wastewater reuse or water reclamation) is the process of converting wastewater into water that can be reused for other purposes.

\* Required

## 1. Gender \*

*Mark only one oval.*

Male

Female

## 2. Age Group \*

*Mark only one oval.*

16-21

21-30

31-40

41-50

51-60

>60

3. Race \*

*Mark only one oval.*

- Black
- Coloured
- White
- Indian
- Other: \_\_\_\_\_

4. Level of Employment \*

*Mark only one oval.*

- Employed
- Self Employed
- Unemployed
- Student

5. Educational Qualifications \*

*Mark only one oval.*

- No level of Education
- Secondary School Certificate
- Diploma (OND/HND)
- Undergraduate Student (100 to 500 level)
- Graduate (BSc)
- Masters Degree
- PhD

6. Residence

*Mark only one oval.*

- Within Canaanland or Covenant University
- Ota and Environs
- Other: \_\_\_\_\_

7. Knowledge on Global Water Shortage \*

*Mark only one oval.*

- No idea at all
- Little knowledge
- Sufficient Knowledge
- Highly Knowledgeable

8. What is your knowledge on Wastewater Recycling and Reuse? \*

*Mark only one oval.*

- No idea at all
- Little knowledge
- Sufficient Knowledge
- Highly Knowledgeable

9. Have you ever seen a wastewater treatment facility?

*Mark only one oval.*

- Yes
- No
- Maybe

10. Recycling & reusing wastewater is environmentally responsible \*

*Mark only one oval.*

- Strongly disagree
- Disagree
- Neutral
- Agree
- Strongly agree

11. Recycling & Reusing wastewater protects the environment from pollutants

*Mark only one oval.*

- Strongly disagree
- Disagree
- Neutral
- Agree
- Strongly agree

12. Recycling & Reusing Wastewater could cause health concerns \*

*Mark only one oval.*

- Strongly disagree
- Disagree
- Neutral
- Agree
- Strongly agree

13. Reusing wastewater will reduce the need for water treatment plant expansions

*Mark only one oval.*

- Strongly disagree
- Disagree
- Neutral
- Agree
- Strongly agree

14. Recycling & Reusing wastewater will bring about economic benefits

*Mark only one oval.*

- Strongly disagree
- Disagree
- Neutral
- Agree
- Strongly agree

15. Have you reused wastewater domestically?

*Mark only one oval.*

- Frequently
- When there is no water supply
- Not very often
- Never (I can't stand the idea)

16. I will be willing to use treated wastewater for the following if proper planning was put into it \*

*Check all that apply.*

- Industrial Use
- Firefighting
- Washing Cars
- Washing cloths
- Watering vegetable gardens
- Watering lawns
- Cooking food
- Flushing toilets
- Swimming pools
- Drinking
- Generate Electricity
- Construction of Buildings

17. I have concerns about using treated wastewater because of? \*

*Check all that apply.*

- Health reasons
- Psychological reasons
- Religious reasons
- I do not trust the treatment process
- Mechanical or equipment breakdown
- Quality of the water
- Lack of adequate revenues to fund the process
- Poor Management of the plant

18. I get information about the environment via the following sources

*Check all that apply.*

- Newspaper & magazines
- Television & Radios
- Internet Sources
- Environmental groups & NGO's
- Academic Research
- Municipal authorities
- Universities
- Never used any of the above

19. Does your institution Or community have any Wastewater treatment facility?

*Mark only one oval.*

- Yes
- No
- Maybe

20. I will trust wastewater reuse processes if it is endorsed by

*Check all that apply.*

- Local Municipalities
- State and Federal Government
- Medical Doctors
- University Professors & Experts
- Farmers or Industrialist
- Internet & media sources

21. I would like wastewater to be recycled at the following levels

*Check all that apply.*

- Own household
- Entire campus
- Whole city

22. What wastewater source can be recycled?

*Check all that apply.*

- Rainwater from my roof to augment water supply
- I prefer to use greywater (water from washing dishes, cloths, own body) to augment water supply
- I prefer to use wastewater from treatment plants to augment water supply

23. Do you believe money can be made from wastewater reuse?

*Mark only one oval.*

- Yes
- No
- Maybe

24. Recycled wastewater can serve as a source of Fertilizer

*Mark only one oval.*

- Strongly disagree
- Disagree
- Neutral
- Agree
- Strongly agree



25. Wastewater reused in agriculture can boost agricultural yield

*Mark only one oval.*

- Strongly disagree
- Disagree
- Neutral
- Agree
- Strongly agree

26. Energy saving is a potential of wastewater reuse

*Mark only one oval.*

- Strongly Disagree
- Disagree
- Neutral
- Agree
- Strongly agree

27. Do you think groundwater levels in your community is sustainable at the current pumping rate?

*Mark only one oval.*

- Yes
- No
- Maybe

28. State any comments you have on wastewater reuse

---

---

---

---

---

---

This content is neither created nor endorsed by Google.

Google Forms
